# Supplementary material for: Favourable Perceptions of Electronic Cigarettes Relative to Cigarettes and the Associations with Susceptibility to Electronic Cigarette Use in Hong Kong Chinese Adolescents
Source: MDPI journal article supplement (doi:10.3390/ijerph15010054), 2018-01-01
Supplement: s1 [file s1]

## Supplementary File

**Table S1.** Association between EC use susceptibility and ever EC use (n = 40,202).

| <b>EC use susceptibility</b> | <b>Crude PR<br/>(95% CI)</b> | <b>Adjusted PR <sup>1</sup><br/>(95% CI)</b> |
|------------------------------|------------------------------|----------------------------------------------|
| Not susceptible              | 1                            | 1                                            |
| Susceptible                  | 18.25 (16.48-19.78) ***      | 10.11 (8.70-11.74) ***                       |

<sup>1</sup> Adjusted for age, sex, perceived family affluence, highest parental education, ever smoking status, family smoking and school clustering effect. \*\*\* $p < 0.001$ .
